# Supplementary material for: AnDHN, a Dehydrin Protein From Ammopiptanthus nanus, Mitigates the Negative Effects of Drought Stress in Plants
Source: Front Plant Sci. 2021 Dec 24;12:788938. doi: 10.3389/fpls.2021.788938 (PMC8739915; doi:10.3389/fpls.2021.788938)
Supplement: Supplementary Table 1 — Expression level of c195333_g1_i1 in A. nanus under drought treatment (RPKM). [file Data_Sheet_1.xlsx]

## Sheet: Table S1
RNA-seq database
Ungene_ID	Length	CK						20% PEG8000
		Repeat 1		Repeat 2		Repeat 3		Repeat 1		Repeat 2		Repeat 3
		read	rpkm	read	rpkm	read	rpkm	read	rpkm	read	rpkm	read	rpkm
c195333_g1_i1	1126	27501	582.624	15666	347.53	48967	1089.02	11408	263.552	209640	4917.97	195530	3659.71

## Sheet: TableS2
The sequence of AnDHN promoter	TACTATAGGG CACGCGTGGT CGACGGTCCG GGCTGGTAAA
	TAAAAGGAGA AAAAAAATGA CGTAGAATAG TCCAAGACCA
	CCCCCTCCGA TGGATGAAGA AGAGATTGGA GTAGAGGGAA
	GGTTGAGAAA GAGATAACTC TAATAAAAAT GTGTAATTAA
	TGGAACAAAA CACCCTATTATGCATAGAGG AGACGGGATA
	ATAAAAGTAA AAATAATTAT AGGAAGCAAC ATTCCTGCA
	AAAATATTATG TGAACCTTAT AACCTTATGC ATATTTAATA
	TTTAGATACT AATGTATTTTTTACATGAAT GCTATAGACT
	TATTATAACA TTGCTATTAA AAACATATAA ACCTCATTGT
	CCAAACAAGA ATTAGTCGGA AAGAATGAAA GAAAGATATG
	ATGTACTGTT TCTTTATCAT AGCCAGGTGT ACGCGATTGC
	TGAGTTATTT GTGCCCTTAC AATGACACAA AATCCTGAGC
	CACCGACTCA TTGAAAATCA TATCCATTCA TGGCCCAGCT
	AGCTTTAATC AAACCTTATC CATTTGGGAC TTCAAGGTTT
	ATCTCATCCT CAAAAACGCA TCCACTAGTT TTCTTTTGTC
	GTGTTGTTCA TTCGCGCCGC GTCACCCCAT GAATCAGAAA
	ACGACAACAG GGATGTCGGT AAAAAAAAAA ACCAACACGC
	GTCCTAGGTA GTACGTGGCG CGCTACAACA ACATTAACGT
	CACATGCCAC GTGTCAAAGC TTGTGAACAA TGAAACCGGT
	GCGCTCACCA GATATTTATT TATGCAATGT TTGCTTGCTT
	ATATAAACAC CATTCACGAA TGCTTCAATC

## Sheet: Table S3
TFBS of AnDHN
TFBS name	Position	Predicted site sequence	Funciton
CRTDREHVCBF2	（-812~-806）	GTCGAC	cold-induced CBF
LTRECOREATCOR15	（-456~452）	CCGAC	cold-induced
MYCCONSENSUSAT	（-407~-400, -110~-104, -103~-97)	CANNTG	ABA and cold-induced
DRE2COREZMRAB17	(-349~-344, -176~-171)	ACCGAC	ABA and drought induced
DREDR1ATRD29AB	(-178~-169)	TACCGACAT	drought,cold and salt stress
DPBFCOREDCDC3	(-156~-151)	ACACNNG	ABA induced
ABRE3OSRAB16	(-140~-130)	GTACGTGGCGC	ABA induced
MYCATRD22	(-110~-105)	CACATG	drought and ABA induced
EMBP1TAEM	(-105~-97)	CACGTGGC	ABA induced
Cis-regulatory element of AnDHN
Motif name	Position	Predicted site sequence	Function
TGACG-motif	(-773~-768,-211~-206)	TGACG	MeJA induced
TGA-element	(-191~-186)	AACGAC	IAA induced
DRE	（-177~-169）	TACCGACAT	Drought, cold and salt stress
ABRE	（-140~-131， -104~-97）	GCCACGTACA	ABA induced

## Sheet: Table S4
Primer used in this study
Primer used in 5' RACE
NUP	AAGCAGTGGTATCAACGCAGAGT
GSP1	AGTATATATA TATATTAAGT TG
GSP2	ATCTATCTAT CTAGACGTC
GSP3	GCTGCTTCAT ACCCACCAGG CGCA
Primer used in 3' RACE
NUP	AAGCAGTGGTATCAACGCAGAGT
GSP4	CATGGCCATG AATTCGCATC
GSP5	CTTTTAAATA TATAAACTTTGA
Primer used in qRT-PCR
AnACTIN F	AGTTG GTTACACCCTTTCTTG
AnACTIN R	TCACCTTCACCGTTCCAGTTT
AnDHN F	ATGGGAGGGAGAAGGAGGAAC
AnDHN R	GGCAGCGCTAGCATGGATGTA
NCED3-F	ACATGGAAATCGGAGTTACAGATAG
NCED3-R	AGAAACAACAAACAAGAAACAGAGC
NCED5-F	AGTTTCACCAACACTAAACCAAGAC
NCED5-R	CATCAACGGAGAGAGATGATTTAAC
CYP707A1-F	AGTACCTAGCCGAGAATCCCAACG
CYP707A1-R	TCGTATTCGACATCTTCGACAGCT
CYP707A3-F	GATTGCCTATTGCCTTGGAACGA
CYP707A3-R	ACTTATATACACTTGGGGGGTCCC
AtACTIN7-F	GGAACTGGAATGGTGAAGGCTG
AtACTIN-R	CGATTGGATACTTCAGAGTGAGGA
Primer used in genomic walking
GW–AP1	GTAATACGACTCACTATAGGGCACGCGTGGTCGACGGCCCGGGCTGGT
GW-AP2	H2N-CCCGACCA-PO4
AP1	GTAATACGACTCACTATAGGGC
AP2	ACTATAGGGCACGCGTGGT
DHN R1	TACTGTTGCTCTCCCGATGCTGCTTC
DHN R2	TTGGTCAGTTTGCCTCACAGGGTTTC
